# Supplementary material
Source: MDPI journal article supplement (https://www.mdpi.com/1099-4300/20/10/778)
Supplement: s1 [file s1]

## Supplementary Materials: Unconventional Deformation Behaviours of Nanoscaled High-entropy Alloys

Yeqiang Bu, Shenyong Peng, Shiwei Wu, Yujie Wei, Gang Wang, Jiabin Liu and Hongtao Wang

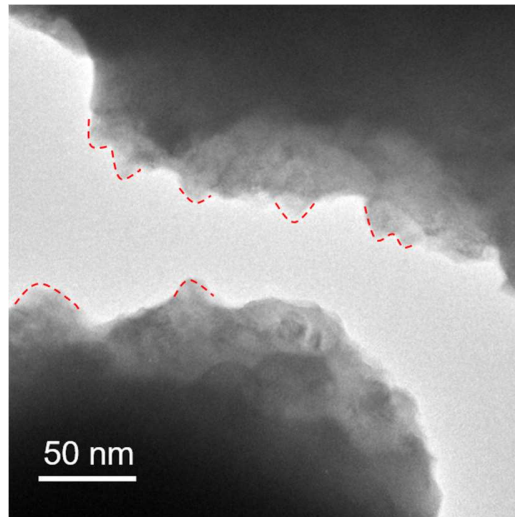

**Figure S1.** The nano-tips on the fractured surface.

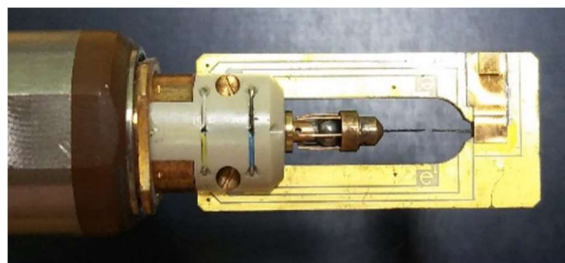

**Figure S2.** Two teared parts with nano-tips are mounted on a Nanofactory transmission electron microscope (TEM)-scanning tunnelling microscope (STM) TEM holder.

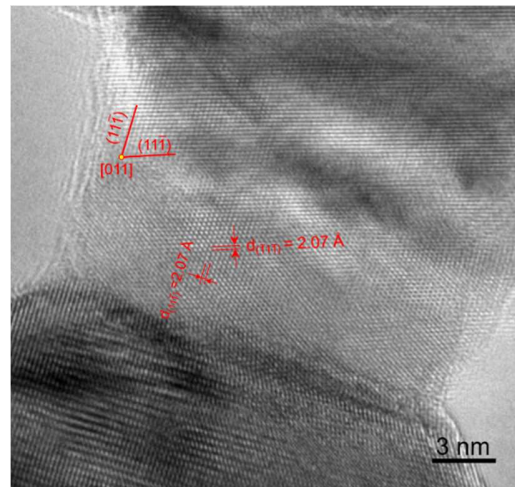

**Figure S3.** The structure keep unchanged during the preparation process. The crystalline interplanar spacing of the  $(\bar{1}1\bar{1})$  plane and  $(11\bar{1})$  are 2.07 Å in the nanoscaled HEA, *i.e.* its lattice parameter is 3.59 Å.

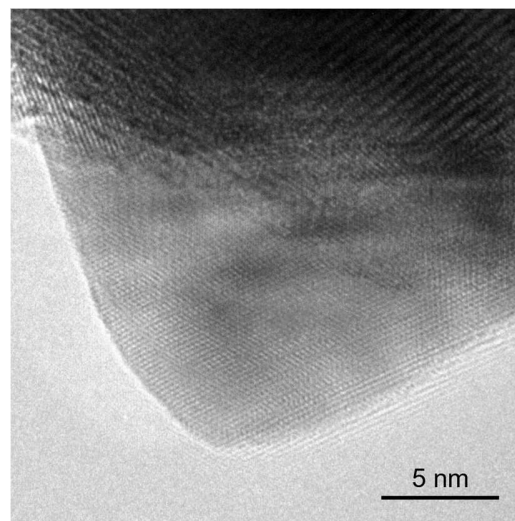

**Figure S4.** The HRTEM image of the nano-tip. There are no oxide layer on its surface.

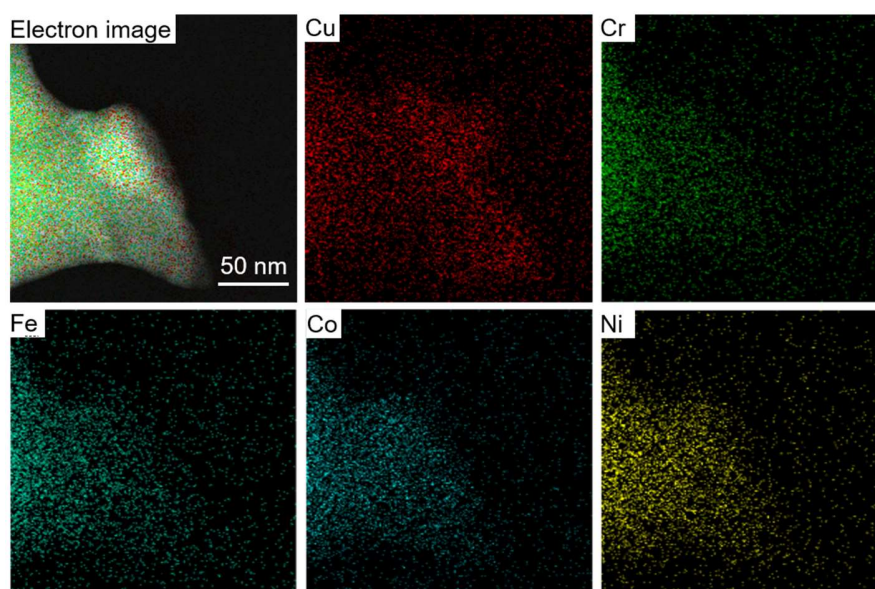

Figure S5. The EDS mapping of the nano-tip shows the elements uniformly distributed in the nano-tip.

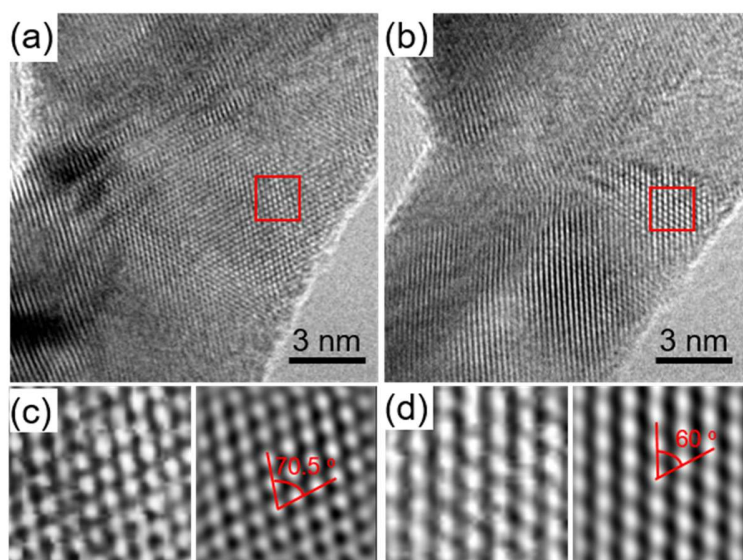

Figure. S6 The another example of the phase transformation. (a) The nanoscaled HEA sample with FCC structure; (b) the nanoscaled HEA after pulling; (c) is enlarged image and inverse fast Fourier transform image corresponding to the red square area in (a), and its angle between two close package plane is  $70.5^\circ$ , which is the typical characteristic of FCC lattice; (d) is enlarged image and inverse fast Fourier transform image corresponding to the red square area in (b), and its angle between two close package plane is  $60^\circ$ , which is the typical characteristic of BCC lattice.

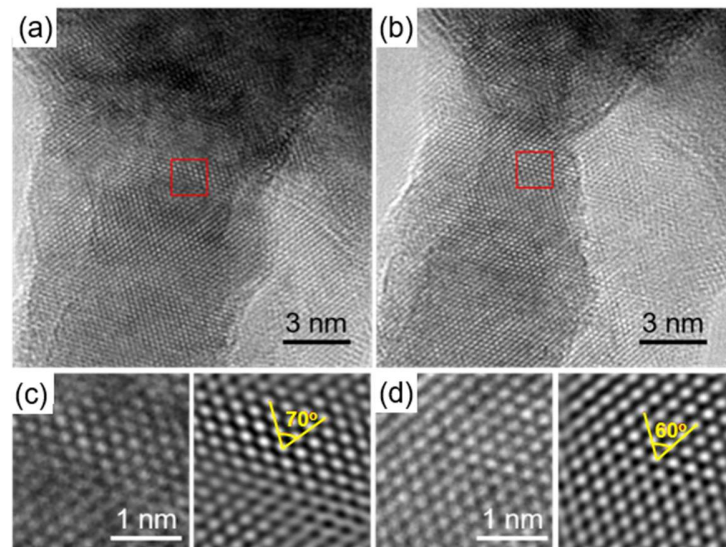

**Figure S7.** The verification experiments about the effects of electron irradiation. (a) The nanoscaled HEA sample with FCC structure, and we pulled the sample at beam-blank condition; (b) the nanoscaled HEA after pulling at beam-blank condition; (c) is enlarged image and inverse fast Fourier transform image corresponding to the red square area in (a), and its angle between two close package plane is  $70^\circ$ , which is the typical characteristic of FCC lattice; (d) is enlarged image and inverse fast Fourier transform image corresponding to the red square area in (b), and its angle between two close package plane is  $60^\circ$ , which is the typical characteristic of BCC lattice. The phase transformation was still observed at beam-blank condition, and confirm the negligible effect of the electron irradiation.
